# Supplementary material for: DPYD, TYMS and MTHFR Genes Polymorphism Frequencies in a Series of Turkish Colorectal Cancer Patients
Source: PubMed Central journal article supplement (PMC6313617; doi:10.3390/jpm8040045), 2018-12-13
Supplement: jpm-08-00045-s001.pdf [file jpm-08-00045-s001.pdf]

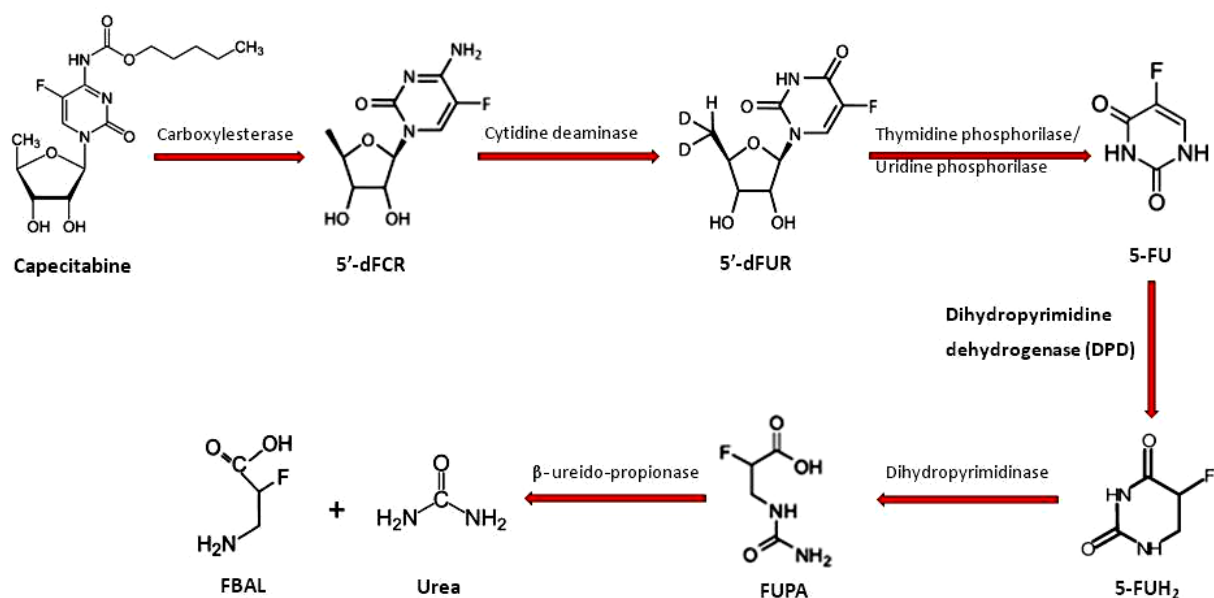

**Supplementary Figure S1.** Catabolism of capecitabine and 5-fluorouracil (5-FU)

5'-dFCR, 5'-deoxy-5-fluorocytidine; 5'-dFUR, 5'-deoxy-5-fluorouridine; 5-FU, 5-fluorouracil; 5-FUH<sub>2</sub>, 5-fluorodihydrouracil; FUP, fluoro-β-ureidopropionate; FBAL, fluoro-β-alanine.

**Supplementary Table S1.** Genotype frequencies of MTHFR 677C >T and 1298A>C polymorphisms in various ethnic groups including our study.

| <i>MTHFR 677C &gt;T, Genotype frequency %</i> |                           |                            |                |
|-----------------------------------------------|---------------------------|----------------------------|----------------|
|                                               | <b>wt/wt <sup>1</sup></b> | <b>wt/mut <sup>2</sup></b> | <b>mut/mut</b> |
| This study/ Turkish                           | <b>47.1</b>               | <b>43.5</b>                | <b>9.4</b>     |
| Caucasian/European                            | 42.3                      | 44.5                       | 13.2           |
| Asian                                         | 68.2                      | 28.3                       | 3.5            |
| Middle Eastern                                | 72.8                      | 24.7                       | 2.5            |
| African                                       | 87.4                      | 12.6                       | 0              |

  

| <i>MTHFR 1298A&gt;C, Genotype frequency %</i> |              |               |                |
|-----------------------------------------------|--------------|---------------|----------------|
|                                               | <b>wt/wt</b> | <b>wt/mut</b> | <b>mut/mut</b> |
| This study/ Turkish                           | <b>89.4</b>  | <b>8.2</b>    | <b>2.4</b>     |
| Caucasian/European                            | 44.1         | 42.5          | 10.7           |
| Asian                                         | 67.2         | 31.4          | 1.4            |
| Middle Eastern                                | 46.8         | 43.1          | 10.2           |
| African                                       | 61.4         | 34.2          | 4.4            |
